# Supplementary material for: Towards ice-thickness inversion: an evaluation of global digital elevation models (DEMs) in the glacierized Tibetan Plateau
Source: Copernicus journal article supplement (doi:10.5194/tc-16-197-2022), 2022-01-21
Supplement: Supplementary file [file tc-16-197-2022-supplement.pdf]

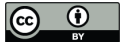

*Supplement of*

## **Towards ice-thickness inversion: an evaluation of global digital elevation models (DEMs) in the glacierized Tibetan Plateau**

**Wenfeng Chen et al.**

*Correspondence to:* Wenfeng Chen ([chenwf@itpcas.ac.cn](mailto:chenwf@itpcas.ac.cn)) and Guoqing Zhang ([guoqing.zhang@itpcas.ac.cn](mailto:guoqing.zhang@itpcas.ac.cn))

The copyright of individual parts of the supplement might differ from the article licence.

**Table S1.** Statistics of elevation difference (m) between six DEMs and ICESat-2 over four glacierized sub-zones (defined in Fig. 7e).

| Item                     | Zone | AW3D30 | SRTM-GL1 | NASADEM | TanDEM-X | SRTM v4.1 | MERIT |
|--------------------------|------|--------|----------|---------|----------|-----------|-------|
| Mean difference          | 1    | 8.1    | 10.6     | 9.1     | 3.9      | 9.2       | 10.1  |
|                          | 2    | 3.0    | 2.5      | 1.5     | 0.3      | 1.7       | 2.9   |
|                          | 3    | -1.1   | -3.7     | -4.4    | -2.1     | -3.2      | -2.0  |
|                          | 4    | -3.6   | -7.1     | -8.4    | -6.0     | -6.8      | -5.9  |
| Absolute Mean difference | 1    | 10.8   | 14.9     | 13.6    | 10.1     | 16.2      | 15.8  |
|                          | 2    | 7.6    | 9.0      | 8.5     | 7.9      | 10.5      | 10.1  |
|                          | 3    | 7.3    | 8.3      | 7.9     | 9.4      | 10.9      | 9.8   |
|                          | 4    | 8.5    | 10.4     | 10.3    | 13.8     | 15.4      | 13.6  |
| Standard Deviation       | 1    | 12.3   | 16.2     | 15.6    | 15.1     | 20.2      | 18.7  |
|                          | 2    | 10.0   | 11.7     | 11.1    | 13.3     | 14.5      | 13.5  |
|                          | 3    | 9.6    | 9.9      | 8.8     | 16.3     | 15.4      | 13.5  |
|                          | 4    | 10.9   | 11.6     | 9.6     | 22.6     | 21.8      | 17.7  |
| RMSE                     | 1    | 14.7   | 19.4     | 18.1    | 15.5     | 22.2      | 21.2  |
|                          | 2    | 10.5   | 12.0     | 11.2    | 13.4     | 14.6      | 13.8  |
|                          | 3    | 9.7    | 10.6     | 9.8     | 16.4     | 15.7      | 13.7  |
|                          | 4    | 11.4   | 13.6     | 12.8    | 23.4     | 22.9      | 18.7  |

**Table S2.** Weights of different models required to achieve minimum mean absolute error in ten experiments.

| AW3D30    |          |      |        |      |       | SRTMGL1 |          |      |        |      |       |   |
|-----------|----------|------|--------|------|-------|---------|----------|------|--------|------|-------|---|
| Exp. No.  | GlabTop2 | HF   | ITIBOV | OGGM | MAE   |         | GlabTop2 | HF   | ITIBOV | OGGM | MAE   |   |
| 1         | 0.00     | 0.41 | 0.50   | 0.09 | 46.71 |         | 0.00     | 0.17 | 0.16   | 0.67 | 54.68 |   |
| 2         | 0.00     | 0.31 | 0.39   | 0.30 | 42.83 |         | 0.00     | 0.24 | 0.15   | 0.61 | 50.41 |   |
| 3         | 0.00     | 0.54 | 0.30   | 0.16 | 45.26 |         | 0.00     | 0.01 | 0.32   | 0.67 | 50.51 |   |
| 4         | 0.00     | 0.34 | 0.47   | 0.19 | 42.64 |         | 0.00     | 0.07 | 0.27   | 0.66 | 53.47 |   |
| 5         | 0.00     | 0.46 | 0.28   | 0.26 | 40.79 |         | 0.00     | 0.25 | 0.16   | 0.59 | 53.46 |   |
| 6         | 0.00     | 0.43 | 0.29   | 0.28 | 41.26 |         | 0.00     | 0.11 | 0.21   | 0.68 | 54.94 |   |
| 7         | 0.00     | 0.47 | 0.29   | 0.24 | 44.28 |         | 0.00     | 0.25 | 0.16   | 0.59 | 58.75 |   |
| 8         | 0.00     | 0.47 | 0.29   | 0.24 | 47.99 |         | 0.00     | 0.12 | 0.29   | 0.59 | 56.47 |   |
| 9         | 0.00     | 0.44 | 0.26   | 0.30 | 47.02 |         | 0.00     | 0.26 | 0.13   | 0.61 | 48.95 |   |
| 10        | 0.00     | 0.41 | 0.50   | 0.09 | 42.04 |         | 0.00     | 0.01 | 0.41   | 0.58 | 53.13 |   |
| Weight    | 0.00     | 0.43 | 0.36   | 0.22 | 44.08 | -       | 0.00     | 0.15 | 0.23   | 0.63 | 53.48 |   |
| NASADEM   |          |      |        |      |       | TanDEM  |          |      |        |      |       |   |
| Exp. No.  | GlabTop2 | HF   | ITIBOV | OGGM | MAE   |         | GlabTop2 | HF   | ITIBOV | OGGM | MAE   |   |
| 1         | 0.00     | 0.76 | 0.01   | 0.23 | 38.37 |         | 0.00     | 0.65 | 0.31   | 0.04 | 37.29 |   |
| 2         | 0.00     | 0.67 | 0.01   | 0.32 | 34.52 |         | 0.00     | 0.67 | 0.32   | 0.01 | 33.03 |   |
| 3         | 0.00     | 0.76 | 0.04   | 0.20 | 39.67 |         | 0.00     | 0.68 | 0.31   | 0.01 | 32.53 |   |
| 4         | 0.00     | 0.85 | 0.01   | 0.14 | 32.63 |         | 0.00     | 0.66 | 0.33   | 0.01 | 41.37 |   |
| 5         | 0.00     | 0.86 | 0.01   | 0.13 | 37.80 |         | 0.00     | 0.66 | 0.31   | 0.03 | 35.95 |   |
| 6         | 0.00     | 0.47 | 0.01   | 0.52 | 43.81 |         | 0.00     | 0.53 | 0.35   | 0.12 | 40.24 |   |
| 7         | 0.00     | 0.71 | 0.07   | 0.22 | 37.59 |         | 0.00     | 0.66 | 0.33   | 0.01 | 39.03 |   |
| 8         | 0.00     | 0.73 | 0.01   | 0.26 | 31.54 |         | 0.00     | 0.68 | 0.31   | 0.01 | 41.47 |   |
| 9         | 0.00     | 0.77 | 0.03   | 0.20 | 34.51 |         | 0.00     | 0.64 | 0.32   | 0.04 | 42.39 |   |
| 10        | 0.00     | 0.85 | 0.01   | 0.14 | 36.11 |         | 0.00     | 0.64 | 0.35   | 0.01 | 41.11 |   |
| Weight    | 0.00     | 0.74 | 0.02   | 0.24 | 36.66 | -       | 0.00     | 0.65 | 0.32   | 0.03 | 38.44 |   |
| SRTM v4.1 |          |      |        |      |       | MERIT   |          |      |        |      |       |   |
| Exp. No.  | GlabTop2 | HF   | ITIBOV | OGGM | MAE   |         | GlabTop2 | HF   | ITIBOV | OGGM | MAE   |   |
| 1         | 0.00     | 0.20 | 0.10   | 0.70 | 53.66 |         | 0.00     | 0.01 | 0.15   | 0.84 | 47.32 |   |
| 2         | 0.00     | 0.28 | 0.11   | 0.61 | 51.83 |         | 0.07     | 0.00 | 0.01   | 0.92 | 51.17 |   |
| 3         | 0.00     | 0.19 | 0.10   | 0.71 | 48.95 |         | 0.00     | 0.03 | 0.06   | 0.91 | 45.13 |   |
| 4         | 0.00     | 0.25 | 0.11   | 0.64 | 53.77 |         | 0.00     | 0.02 | 0.01   | 0.97 | 52.50 |   |
| 5         | 0.00     | 0.28 | 0.11   | 0.61 | 52.71 |         | 0.13     | 0.02 | 0.00   | 0.85 | 49.88 |   |
| 6         | 0.00     | 0.22 | 0.20   | 0.58 | 58.19 |         | 0.15     | 0.05 | 0.00   | 0.80 | 48.80 |   |
| 7         | 0.00     | 0.21 | 0.15   | 0.64 | 51.56 |         | 0.00     | 0.33 | 0.04   | 0.63 | 49.50 |   |
| 8         | 0.00     | 0.19 | 0.10   | 0.71 | 49.35 |         | 0.00     | 0.11 | 0.22   | 0.67 | 44.28 |   |
| 9         | 0.00     | 0.20 | 0.13   | 0.67 | 48.62 |         | 0.00     | 0.01 | 0.16   | 0.83 | 53.20 |   |
| 10        | 0.00     | 0.25 | 0.11   | 0.64 | 48.12 |         | 0.01     | 0.00 | 0.05   | 0.94 | 52.27 |   |
| Weight    | 0.00     | 0.23 | 0.12   | 0.65 | 51.68 | -       | 0.04     | 0.06 | 0.07   | 0.84 | 49.41 | - |

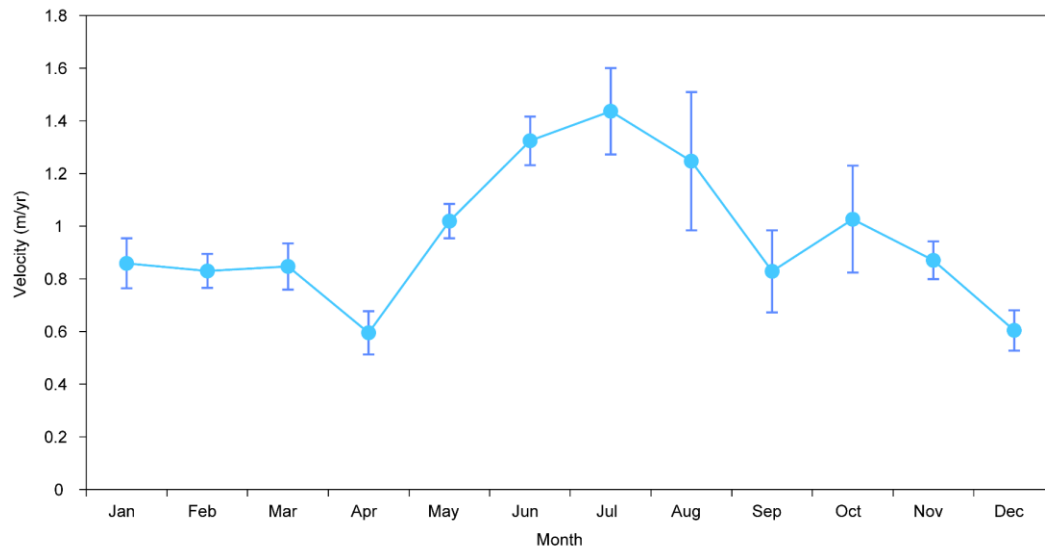

**Fig. S1** Mean monthly ice velocity from Global Land Ice Velocity Extraction by Landsat 8 (GoLIVE) in path 147 and row 038 where Chhota Shigri is located.
